# Supplementary material
Source: PubMed Central journal article supplement (PMC5770195)
Supplement: NIHMS929926-supplement-1.pdf [file NIHMS929926-supplement-1.pdf]

# THE LANCET

## Haematology

### Supplementary appendix

This appendix formed part of the original submission and has been peer reviewed.  
We post it as supplied by the authors.

Supplement to: Williams KM, Holter-Chakrabarty J, Lindenberg L, et al.  
Imaging of subclinical haemopoiesis after stem-cell transplantation in patients  
with haematological malignancies: a prospective pilot study. *Lancet Haematol* 2017;  
published online Dec 13. [http://dx.doi.org/10.1016/S2352-3026\(17\)30215-6](http://dx.doi.org/10.1016/S2352-3026(17)30215-6).

## APPENDIX, page 1

### TRIAL SCHEMA AND IMAGING ANALYSIS

Trial Schema

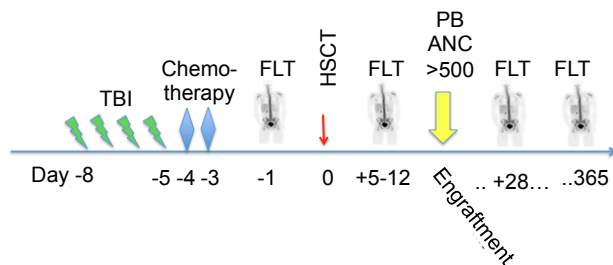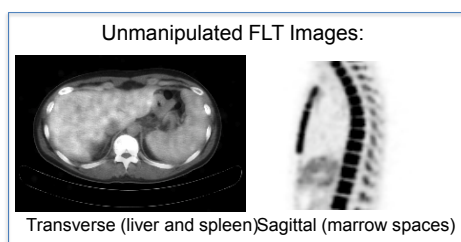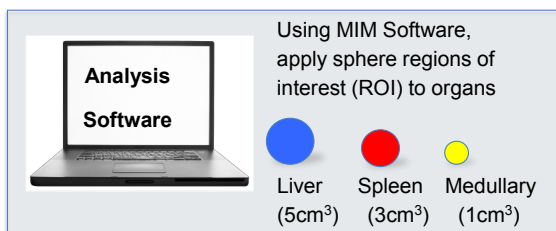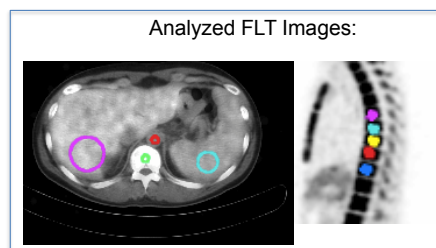

Timeline and imaging analysis. **Above**, Timeline of treatment and imaging of patients. Regions of interest were captured on FLT images in the transverse and sagittal planes. **Below**, Analysis of the FLT images. Spherical, 1- mL (10-mm<sup>3</sup>) regions of interest were drawn in marrow areas, including the spine, sternum, humeri, femurs, and liver and spleen. ANC, absolute neutrophil count; FLT, <sup>18</sup>F-fluorothymidine imaging; HSCT, day of hematopoietic stem cell transplantation; PB, peripheral blood; TBI, total-body irradiation.

## APPENDIX, page 2

### Additional FLT images

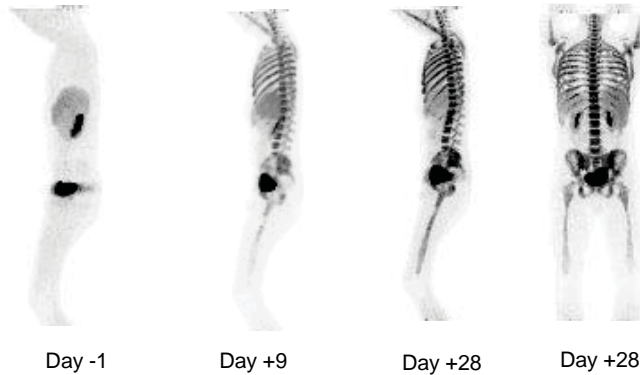

Imaging of osseous sites after HSCT. Additional representative FLT images of thin the sagittal plane on day -1, day +9, and day +28. The coronal day +28 image is a maximum intensity projection (MIP) to permit views of the extremities and full spine simultaneously; all are scaled equally.

### Evidence for splenic donor hematopoiesis

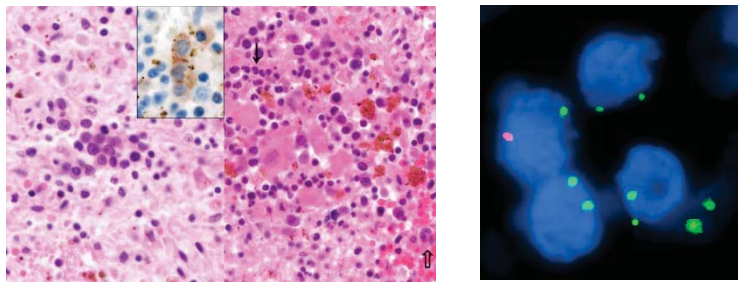

Donor hematopoiesis in spleen early after HSCT. The spleen in one of the two patients identified with donor splenic hematopoiesis soon after HSCT. Hematoxylin and eosin (60x) examination of pathology specimens shows hematopoiesis (*left*). *Inset*, Kit (i.e., hematopoietic stem cell marker) expression is revealed in the sample. XY FISH (*right*) shows the X chromosomes (*green*) and Y chromosome (*red*), demonstrating hematopoietic cells of donor origin (i.e., female with two X chromosomes). *Arrow* shows area of hematopoiesis in the spleen. FISH, fluorescent in situ hybridization; HSCT, hematopoietic stem cell transplantation.
